# Supplementary material
Source: MDPI journal article supplement (https://www.mdpi.com/2073-445X/13/2/263)
Supplement: s1 [file s1]

Article

# Spatial–Temporal Evolution Analysis of the Development of Jingdang and Famen Townships in the Vicinity of the Capital City Site of the Western Zhou Dynasty in China

Jian Chen <sup>1</sup>, Kai Wang <sup>1</sup>, Yingqiang Yuan <sup>1</sup>, Peiyao Li <sup>1</sup>, Lixin Niu <sup>1</sup>, Jiangning Song <sup>2</sup> and Yanlong Zhang <sup>1,\*</sup>

<sup>1</sup> College of Landscape Architecture and Art, Northwest A&F University, Yangling 712100, China; chen-jian1984@nwafu.edu.cn(J.C.); wskt@nwafu.edu.cn(K.W.); yuanyingqiang@nwafu.edu.cn(Y.Y.); peiyaoli@nwafu.edu.cn(P.L.); niulixin@nwsuaf.edu.cn(L.N.)

<sup>2</sup> Institute of Archaeology Chinese Academy of Social Sciences, Beijing, 100710, China; 13991296198@163.com

\* Correspondence: zhangyanlong@nwafu.edu.cn

Confusion matrix for land use classification accuracy verification from 1982 to 2022 (Table S1–Table S5).

**Table S1.** Confusion matrix accuracy verification on 1982 remote sensing images.

| Ground Truth Pixels                              |            |                 |                                    |                    |                                    |        |        |
|--------------------------------------------------|------------|-----------------|------------------------------------|--------------------|------------------------------------|--------|--------|
| Type                                             | CL         | FL              | GL                                 | COL                | UL                                 | WA     | Total  |
| CL                                               | 144.00     | 2.00            | 3.00                               | 5.00               | 1.00                               | 0.00   | 155.00 |
| FL                                               | 2.00       | 131.00          | 3.00                               | 1.00               | 0.00                               | 0.00   | 137.00 |
| GL                                               | 3.00       | 13.00           | 140.00                             | 1.00               | 1.00                               | 2.00   | 160.00 |
| COL                                              | 1.00       | 0.00            | 1.00                               | 142.00             | 2.00                               | 0.00   | 146.00 |
| UL                                               | 0.00       | 4.00            | 0.00                               | 1.00               | 106.00                             | 1.00   | 112.00 |
| WA                                               | 0.00       | 0.00            | 4.00                               | 0.00               | 0.00                               | 107.00 | 111.00 |
| Total                                            | 150.00     | 150.00          | 151.00                             | 150.00             | 110.00                             | 110.00 | 821.00 |
| Ground Truth Percent                             |            |                 |                                    |                    |                                    |        |        |
| Type                                             | CL         | FL              | GL                                 | COL                | UL                                 | WA     | Total  |
| CL                                               | 96.00      | 1.33            | 1.99                               | 3.33               | 0.91                               | 0.00   | 18.88  |
| FL                                               | 1.33       | 87.33           | 1.98                               | 0.66               | 0.00                               | 0.00   | 16.69  |
| GL                                               | 2.00       | 8.67            | 92.72                              | 0.67               | 0.91                               | 1.82   | 19.49  |
| COL                                              | 0.67       | 0.00            | 0.66                               | 94.67              | 1.82                               | 0.00   | 17.78  |
| UL                                               | 0.00       | 2.67            | 0.00                               | 0.67               | 96.36                              | 0.91   | 13.64  |
| WA                                               | 0.00       | 0.00            | 2.65                               | 0.00               | 0.00                               | 97.27  | 13.52  |
| Total                                            | 100.00     | 100.00          | 100.00                             | 100.00             | 100.00                             | 100.00 | 100.00 |
| Commission Error (CE) and Omission Error (OE)    |            |                 |                                    |                    |                                    |        |        |
| Type                                             | CE Percent | OE Per-<br>cent | CE Pixels<br>(Number/Total number) |                    | OE Pixels<br>(Number/Total number) |        |        |
| CL                                               | 7.10       | 4.00            | 11/155                             |                    | 6/150                              |        |        |
| FL                                               | 4.38       | 12.67           | 6/137                              |                    | 19/150                             |        |        |
| GL                                               | 12.50      | 7.28            | 20/160                             |                    | 11/151                             |        |        |
| COL                                              | 2.74       | 5.33            | 4/146                              |                    | 8/150                              |        |        |
| UL                                               | 5.36       | 3.64            | 6/112                              |                    | 4/110                              |        |        |
| WA                                               | 3.60       | 2.73            | 4/111                              |                    | 3/110                              |        |        |
| Producer's Accuracy (PA) and Use's Accuracy (UA) |            |                 |                                    |                    |                                    |        |        |
| Type                                             | PA Percent | UA Per-<br>cent | PA Pixels<br>(Number/Total number) |                    | UA Pixels<br>(Number/Total number) |        |        |
| CL                                               | 96.00      | 92.90           | 144/150                            |                    | 144/155                            |        |        |
| FL                                               | 87.33      | 95.62           | 131/150                            |                    | 131/137                            |        |        |
| GL                                               | 92.72      | 87.50           | 140/151                            |                    | 140/160                            |        |        |
| COL                                              | 94.67      | 97.26           | 142/150                            |                    | 142/146                            |        |        |
| UL                                               | 96.36      | 94.64           | 106/110                            |                    | 106/112                            |        |        |
| WA                                               | 97.27      | 96.40           | 107/110                            |                    | 107/111                            |        |        |
| Overall Results                                  |            |                 |                                    |                    |                                    |        |        |
| Overall Accuracy                                 |            |                 |                                    | 93.7881% (770/821) |                                    |        |        |

Kappa Coefficient

0.9252

**Table S2.** Confusion matrix accuracy verification on 1992 remote sensing images.

| Ground Truth Pixels                              |            |                 |                                    |        |                                    |        |        |
|--------------------------------------------------|------------|-----------------|------------------------------------|--------|------------------------------------|--------|--------|
| Type                                             | CL         | FL              | GL                                 | COL    | UL                                 | WA     | Total  |
| CL                                               | 143.00     | 2.00            | 3.00                               | 1.00   | 3.00                               | 2.00   | 154.00 |
| FL                                               | 2.00       | 142.00          | 2.00                               | 1.00   | 1.00                               | 0.00   | 148.00 |
| GL                                               | 3.00       | 6.00            | 145.00                             | 2.00   | 1.00                               | 3.00   | 160.00 |
| COL                                              | 1.00       | 0.00            | 0.00                               | 142.00 | 2.00                               | 0.00   | 145.00 |
| UL                                               | 1.00       | 0.00            | 1.00                               | 4.00   | 103.00                             | 3.00   | 112.00 |
| WA                                               | 0.00       | 0.00            | 0.00                               | 0.00   | 0.00                               | 102.00 | 102.00 |
| Total                                            | 150.00     | 150.00          | 151.00                             | 150.00 | 110.00                             | 110.00 | 821.00 |
| Ground Truth Percent                             |            |                 |                                    |        |                                    |        |        |
| Type                                             | CL         | FL              | GL                                 | COL    | UL                                 | WA     | Total  |
| CL                                               | 95.33      | 1.33            | 1.99                               | 0.67   | 2.73                               | 1.82   | 18.76  |
| FL                                               | 1.33       | 94.67           | 1.32                               | 0.66   | 0.91                               | 0.00   | 18.03  |
| GL                                               | 2.00       | 4.00            | 96.03                              | 1.33   | 0.90                               | 2.72   | 19.49  |
| COL                                              | 0.67       | 0.00            | 0.00                               | 94.67  | 1.82                               | 0.00   | 17.66  |
| UL                                               | 0.67       | 0.00            | 0.66                               | 2.67   | 93.64                              | 2.73   | 13.64  |
| WA                                               | 0.00       | 0.00            | 0.00                               | 0.00   | 0.00                               | 92.73  | 12.42  |
| Total                                            | 100.00     | 100.00          | 100.00                             | 100.00 | 100.00                             | 100.00 | 100.00 |
| Commission Error (CE) and Omission Error (OE)    |            |                 |                                    |        |                                    |        |        |
| Type                                             | CE Percent | OE Per-<br>cent | CE Pixels<br>(Number/Total number) |        | OE Pixels<br>(Number/Total number) |        |        |
| CL                                               | 7.14       | 4.67            | 11/154                             |        | 7/150                              |        |        |
| FL                                               | 4.05       | 5.33            | 6/148                              |        | 8/150                              |        |        |
| GL                                               | 9.38       | 3.97            | 15/160                             |        | 6/151                              |        |        |
| COL                                              | 2.07       | 5.33            | 3/145                              |        | 8/150                              |        |        |
| UL                                               | 8.04       | 6.36            | 9/112                              |        | 7/110                              |        |        |
| WA                                               | 0.00       | 7.27            | 0/102                              |        | 8/110                              |        |        |
| Producer's Accuracy (PA) and Use's Accuracy (UA) |            |                 |                                    |        |                                    |        |        |
| Type                                             | PA Percent | UA Per-<br>cent | PA Pixels<br>(Number/Total number) |        | UA Pixels<br>(Number/Total number) |        |        |
| CL                                               | 95.33      | 92.86           | 143/150                            |        | 143/154                            |        |        |
| FL                                               | 94.67      | 95.95           | 142/150                            |        | 142/148                            |        |        |
| GL                                               | 96.03      | 90.63           | 145/151                            |        | 145/160                            |        |        |
| COL                                              | 94.67      | 97.93           | 142/150                            |        | 142/145                            |        |        |
| UL                                               | 93.64      | 91.96           | 103/110                            |        | 103/112                            |        |        |
| WA                                               | 92.73      | 100.00          | 102/110                            |        | 102/102                            |        |        |
| Overall Results                                  |            |                 |                                    |        |                                    |        |        |
| Overall Accuracy                                 |            |                 | 94.6407% (777/821)                 |        |                                    |        |        |

Kappa Coefficient

0.9354

**Table S3.** Confusion matrix accuracy verification on 2002 remote sensing images.

| Ground Truth Pixels                              |            |                 |                                    |                    |                                    |        |        |
|--------------------------------------------------|------------|-----------------|------------------------------------|--------------------|------------------------------------|--------|--------|
| Type                                             | CL         | FL              | GL                                 | COL                | UL                                 | WA     | Total  |
| CL                                               | 144.00     | 5.00            | 1.00                               | 1.00               | 0.00                               | 0.00   | 151.00 |
| FL                                               | 1.00       | 135.00          | 3.00                               | 1.00               | 1.00                               | 1.00   | 142.00 |
| GL                                               | 2.00       | 3.00            | 143.00                             | 1.00               | 2.00                               | 1.00   | 152.00 |
| COL                                              | 1.00       | 2.00            | 1.00                               | 145.00             | 1.00                               | 0.00   | 150.00 |
| UL                                               | 1.00       | 2.00            | 2.00                               | 2.00               | 104.00                             | 1.00   | 112.00 |
| WA                                               | 1.00       | 3.00            | 0.00                               | 0.00               | 2.00                               | 107.00 | 113.00 |
| Total                                            | 150.00     | 150.00          | 150.00                             | 150.00             | 110.00                             | 110.00 | 820.00 |
| Ground Truth Percent                             |            |                 |                                    |                    |                                    |        |        |
| Type                                             | CL         | FL              | GL                                 | COL                | UL                                 | WA     | Total  |
| CL                                               | 96.00      | 3.33            | 0.67                               | 0.67               | 0.00                               | 0.00   | 18.41  |
| FL                                               | 0.67       | 90.00           | 2.00                               | 0.67               | 0.91                               | 0.91   | 17.32  |
| GL                                               | 1.33       | 2.00            | 95.33                              | 0.67               | 1.82                               | 0.91   | 18.54  |
| COL                                              | 0.67       | 1.33            | 0.67                               | 96.67              | 0.91                               | 0.00   | 18.29  |
| UL                                               | 0.66       | 1.34            | 1.33                               | 1.32               | 94.54                              | 0.91   | 13.66  |
| WA                                               | 0.67       | 2.00            | 0.00                               | 0.00               | 1.82                               | 97.27  | 13.78  |
| Total                                            | 100.00     | 100.00          | 100.00                             | 100.00             | 100.00                             | 100.00 | 100.00 |
| Commission Error (CE) and Omission Error (OE)    |            |                 |                                    |                    |                                    |        |        |
| Type                                             | CE Percent | OE Per-<br>cent | CE Pixels<br>(Number/Total number) |                    | OE Pixels<br>(Number/Total number) |        |        |
| CL                                               | 4.64       | 4.00            | 1/151                              |                    | 6/150                              |        |        |
| FL                                               | 4.93       | 10.00           | 7/142                              |                    | 15/150                             |        |        |
| GL                                               | 5.92       | 4.67            | 9/152                              |                    | 7/150                              |        |        |
| COL                                              | 3.33       | 3.33            | 5/150                              |                    | 5/150                              |        |        |
| UL                                               | 7.14       | 5.45            | 8/112                              |                    | 6/110                              |        |        |
| WA                                               | 5.31       | 273             | 6/113                              |                    | 3/110                              |        |        |
| Producer's Accuracy (PA) and Use's Accuracy (UA) |            |                 |                                    |                    |                                    |        |        |
| Type                                             | PA Percent | UA Per-<br>cent | PA Pixels<br>(Number/Total number) |                    | UA Pixels<br>(Number/Total number) |        |        |
| CL                                               | 96.00      | 95.36           | 144/150                            |                    | 144/151                            |        |        |
| FL                                               | 90.00      | 95.07           | 135/150                            |                    | 135/142                            |        |        |
| GL                                               | 95.33      | 94.08           | 143/150                            |                    | 143/152                            |        |        |
| COL                                              | 96.67      | 96.67           | 145/150                            |                    | 145/150                            |        |        |
| UL                                               | 94.55      | 92.86           | 104/110                            |                    | 104/112                            |        |        |
| WA                                               | 97.27      | 94.69           | 107/110                            |                    | 107/113                            |        |        |
| Overall Results                                  |            |                 |                                    |                    |                                    |        |        |
| Overall Accuracy                                 |            |                 |                                    | 94.8780% (778/820) |                                    |        |        |

Kappa Coefficient

0.9383

**Table S4.** Confusion matrix accuracy verification on 2012 remote sensing images.

| Ground Truth Pixels                              |            |                 |                                    |                    |                                    |        |        |
|--------------------------------------------------|------------|-----------------|------------------------------------|--------------------|------------------------------------|--------|--------|
| Type                                             | CL         | FL              | GL                                 | COL                | UL                                 | WA     | Total  |
| CL                                               | 145.00     | 1.00            | 2.00                               | 18.00              | 1.00                               | 1.00   | 168.00 |
| FL                                               | 1.00       | 139.00          | 3.00                               | 0.00               | 1.00                               | 1.00   | 145.00 |
| GL                                               | 1.00       | 4.00            | 143.00                             | 1.00               | 1.00                               | 3.00   | 153.00 |
| COL                                              | 1.00       | 2.00            | 1.00                               | 125.00             | 1.00                               | 0.00   | 130.00 |
| UL                                               | 1.00       | 1.00            | 1.00                               | 0.00               | 105.00                             | 0.00   | 108.00 |
| WA                                               | 1.00       | 3.00            | 0.00                               | 6.00               | 1.00                               | 95.00  | 106.00 |
| Total                                            | 150.00     | 150.00          | 150.00                             | 150.00             | 110.00                             | 100.00 | 810.00 |
| Ground Truth Percent                             |            |                 |                                    |                    |                                    |        |        |
| Type                                             | CL         | FL              | GL                                 | COL                | UL                                 | WA     | Total  |
| CL                                               | 96.67      | 0.67            | 1.33                               | 12.00              | 0.91                               | 1.00   | 20.74  |
| FL                                               | 0.67       | 92.67           | 2.00                               | 0.00               | 0.91                               | 1.00   | 17.90  |
| GL                                               | 0.67       | 2.67            | 95.33                              | 0.67               | 0.91                               | 3.00   | 18.89  |
| COL                                              | 0.67       | 1.33            | 0.67                               | 83.33              | 0.91                               | 0.00   | 16.05  |
| UL                                               | 0.65       | 0.66            | 0.67                               | 0.00               | 95.45                              | 0.00   | 13.33  |
| WA                                               | 0.67       | 2.00            | 0.00                               | 4.00               | 0.91                               | 95.00  | 13.09  |
| Total                                            | 100.00     | 100.00          | 100.00                             | 100.00             | 100.00                             | 100.00 | 100.00 |
| Commission Error (CE) and Omission Error (OE)    |            |                 |                                    |                    |                                    |        |        |
| Type                                             | CE Percent | OE Per-<br>cent | CE Pixels<br>(Number/Total number) |                    | OE Pixels<br>(Number/Total number) |        |        |
| CL                                               | 13.69      | 3.33            | 23/168                             |                    | 5/150                              |        |        |
| FL                                               | 4.14       | 7.33            | 6/145                              |                    | 11/150                             |        |        |
| GL                                               | 6.54       | 4.67            | 10/153                             |                    | 7/150                              |        |        |
| COL                                              | 3.85       | 16.67           | 5/130                              |                    | 25/150                             |        |        |
| UL                                               | 2.78       | 4.55            | 3/108                              |                    | 5/110                              |        |        |
| WA                                               | 10.38      | 5.00            | 11/106                             |                    | 5/100                              |        |        |
| Producer's Accuracy (PA) and Use's Accuracy (UA) |            |                 |                                    |                    |                                    |        |        |
| Type                                             | PA Percent | UA Per-<br>cent | PA Pixels<br>(Number/Total number) |                    | UA Pixels<br>(Number/Total number) |        |        |
| CL                                               | 96.67      | 86.31           | 145/150                            |                    | 145/168                            |        |        |
| FL                                               | 92.67      | 95.86           | 139/150                            |                    | 139/145                            |        |        |
| GL                                               | 95.33      | 93.46           | 143/150                            |                    | 143/153                            |        |        |
| COL                                              | 83.33      | 96.15           | 125/150                            |                    | 125/130                            |        |        |
| UL                                               | 95.45      | 97.22           | 105/110                            |                    | 105/108                            |        |        |
| WA                                               | 95.00      | 89.62           | 95/100                             |                    | 95/106                             |        |        |
| Overall Results                                  |            |                 |                                    |                    |                                    |        |        |
| Overall Accuracy                                 |            |                 |                                    | 92.8395% (752/810) |                                    |        |        |

Kappa Coefficient

0.9137

**Table S5.** Confusion matrix accuracy verification on 2022 remote sensing images.

| Ground Truth Pixels                              |            |                 |                                    |                    |                                    |        |        |
|--------------------------------------------------|------------|-----------------|------------------------------------|--------------------|------------------------------------|--------|--------|
| Type                                             | CL         | FL              | GL                                 | COL                | UL                                 | WA     | Total  |
| CL                                               | 142.00     | 2.00            | 2.00                               | 3.00               | 1.00                               | 1.00   | 151.00 |
| FL                                               | 1.00       | 142.00          | 2.00                               | 1.00               | 3.00                               | 1.00   | 150.00 |
| GL                                               | 5.00       | 3.00            | 144.00                             | 2.00               | 3.00                               | 2.00   | 159.00 |
| COL                                              | 0.00       | 2.00            | 1.00                               | 143.00             | 0.00                               | 0.00   | 146.00 |
| UL                                               | 2.00       | 1.00            | 1.00                               | 1.00               | 102.00                             | 1.00   | 108.00 |
| WA                                               | 0.00       | 0.00            | 0.00                               | 0.00               | 1.00                               | 95.00  | 96.00  |
| Total                                            | 150.00     | 150.00          | 150.00                             | 150.00             | 110.00                             | 100.00 | 810.00 |
| Ground Truth Percent                             |            |                 |                                    |                    |                                    |        |        |
| Type                                             | CL         | FL              | GL                                 | COL                | UL                                 | WA     | Total  |
| CL                                               | 94.67      | 1.33            | 1.33                               | 2.00               | 0.91                               | 1.00   | 18.64  |
| FL                                               | 0.67       | 94.67           | 1.33                               | 0.67               | 2.73                               | 1.00   | 18.53  |
| GL                                               | 3.33       | 2.00            | 96.00                              | 1.33               | 2.73                               | 2.00   | 19.63  |
| COL                                              | 0.00       | 1.33            | 0.67                               | 95.33              | 0.00                               | 0.00   | 18.02  |
| UL                                               | 1.33       | 0.67            | 0.67                               | 0.67               | 92.72                              | 1.00   | 13.33  |
| WA                                               | 0.00       | 0.00            | 0.00                               | 0.00               | 0.91                               | 95.00  | 11.85  |
| Total                                            | 100.00     | 100.00          | 100.00                             | 100.00             | 100.00                             | 100.00 | 100.00 |
| Commission Error (CE) and Omission Error (OE)    |            |                 |                                    |                    |                                    |        |        |
| Type                                             | CE Percent | OE Per-<br>cent | CE Pixels<br>(Number/Total number) |                    | OE Pixels<br>(Number/Total number) |        |        |
| CL                                               | 5.96       | 5.33            | 9/151                              |                    | 8/150                              |        |        |
| FL                                               | 5.33       | 5.33            | 8/150                              |                    | 8/150                              |        |        |
| GL                                               | 9.43       | 4.00            | 15/159                             |                    | 6/150                              |        |        |
| COL                                              | 2.05       | 4.67            | 3/146                              |                    | 7/150                              |        |        |
| UL                                               | 5.56       | 7.27            | 6/108                              |                    | 8/110                              |        |        |
| WA                                               | 1.04       | 5.00            | 1/96                               |                    | 5/100                              |        |        |
| Producer's Accuracy (PA) and Use's Accuracy (UA) |            |                 |                                    |                    |                                    |        |        |
| Type                                             | PA Percent | UA Per-<br>cent | PA Pixels<br>(Number/Total number) |                    | UA Pixels<br>(Number/Total number) |        |        |
| CL                                               | 94.67      | 94.04           | 142/150                            |                    | 142/151                            |        |        |
| FL                                               | 94.67      | 94.67           | 142/150                            |                    | 142/150                            |        |        |
| GL                                               | 96.00      | 90.57           | 144/150                            |                    | 144/159                            |        |        |
| COL                                              | 95.33      | 97.95           | 143/150                            |                    | 143/146                            |        |        |
| UL                                               | 92.73      | 94.44           | 102/110                            |                    | 102/108                            |        |        |
| WA                                               | 95.00      | 98.96           | 95/100                             |                    | 95/96                              |        |        |
| Overall Results                                  |            |                 |                                    |                    |                                    |        |        |
| Overall Accuracy                                 |            |                 |                                    | 94.8148% (768/810) |                                    |        |        |

|                   |        |
|-------------------|--------|
| Kappa Coefficient | 0.9374 |
|-------------------|--------|

Land use transfer matrix data from 1982 to 2022 (Table S6–Table S9).

**Table S6.** Land use transfer matrix between 1982 and 1992 (km<sup>2</sup>).

|          |     | 1992  |       |       |      |      |      | Total  | Decrease |
|----------|-----|-------|-------|-------|------|------|------|--------|----------|
|          |     | CL    | FL    | GL    | COL  | UL   | WA   |        |          |
| 1982     | CL  | 94.11 | 0.00  | 0.00  | 2.47 | 1.04 | 0.79 | 98.41  | 4.30     |
|          | FL  | 0.18  | 34.51 | 0.44  | 0.00 | 0.01 | 0.00 | 35.14  | 0.63     |
|          | GL  | 0.40  | 0.47  | 24.64 | 0.00 | 0.01 | 0.50 | 26.02  | 1.38     |
|          | COL | 2.04  | 0.08  | 0.05  | 6.58 | 0.05 | 0.02 | 8.82   | 2.24     |
|          | UL  | 0.93  | 0.57  | 0.25  | 0.07 | 0.46 | 0.11 | 2.39   | 1.93     |
|          | WA  | 0.04  | 0.04  | 0.09  | 0.00 | 0.08 | 1.13 | 1.38   | 0.25     |
| Total    |     | 97.70 | 35.67 | 25.47 | 9.12 | 1.65 | 2.55 | 172.16 |          |
| Increase |     | 3.59  | 1.16  | 0.83  | 2.54 | 1.19 | 1.42 |        |          |

**Table S7.** Land use transfer matrix between 1992 and 2002 (km<sup>2</sup>).

|          |     | 2002  |       |       |       |      |      | Total  | Decrease |
|----------|-----|-------|-------|-------|-------|------|------|--------|----------|
|          |     | CL    | FL    | GL    | COL   | UL   | WA   |        |          |
| 1992     | CL  | 88.45 | 1.80  | 0.67  | 6.11  | 0.55 | 0.12 | 97.70  | 9.25     |
|          | FL  | 1.82  | 30.91 | 2.64  | 0.19  | 0.08 | 0.05 | 35.69  | 4.78     |
|          | GL  | 0.98  | 2.40  | 20.62 | 0.11  | 1.26 | 0.10 | 25.47  | 4.85     |
|          | COL | 1.83  | 0.11  | 0.04  | 7.02  | 0.10 | 0.03 | 9.13   | 2.11     |
|          | UL  | 0.55  | 0.16  | 0.14  | 0.12  | 0.54 | 0.10 | 1.61   | 1.07     |
|          | WA  | 0.40  | 0.22  | 0.32  | 0.06  | 0.11 | 1.45 | 2.56   | 1.11     |
| Total    |     | 94.03 | 35.6  | 24.43 | 13.61 | 2.64 | 1.85 | 172.16 |          |
| Increase |     | 5.58  | 4.69  | 3.81  | 6.59  | 2.10 | 0.40 |        |          |

**Table S8.** Land use transfer matrix between 2002 and 2012 (km<sup>2</sup>).

|          |     | 2012  |       |       |       |      |      | Total  | Decrease |
|----------|-----|-------|-------|-------|-------|------|------|--------|----------|
|          |     | CL    | FL    | GL    | COL   | UL   | WA   |        |          |
| 2002     | CL  | 89.34 | 2.23  | 0.08  | 1.62  | 0.63 | 0.12 | 94.02  | 4.68     |
|          | FL  | 3.59  | 30.42 | 0.95  | 0.27  | 0.28 | 0.08 | 35.59  | 5.17     |
|          | GL  | 0.35  | 1.09  | 22.64 | 0.00  | 0.03 | 0.31 | 24.42  | 1.78     |
|          | COL | 0.86  | 0.03  | 0.03  | 12.58 | 0.05 | 0.05 | 13.60  | 1.02     |
|          | UL  | 0.91  | 0.25  | 0.25  | 0.01  | 1.17 | 0.09 | 2.68   | 1.51     |
|          | WA  | 0.11  | 0.06  | 0.09  | 0.01  | 0.01 | 1.57 | 1.85   | 0.28     |
| Total    |     | 95.16 | 34.08 | 24.04 | 14.49 | 2.17 | 2.22 | 172.16 |          |
| Increase |     | 5.82  | 3.66  | 1.40  | 1.91  | 1.00 | 0.65 |        |          |

**Table S9.** Land use transfer matrix between 2012 and 2022 (km<sup>2</sup>).

|          |     | 2022  |       |       |       |      |      | Total  | Decrease |
|----------|-----|-------|-------|-------|-------|------|------|--------|----------|
|          |     | CL    | FL    | GL    | COL   | UL   | WA   |        |          |
| 2012     | CL  | 88.01 | 1.19  | 0.42  | 4.80  | 0.62 | 0.01 | 95.05  | 7.04     |
|          | FL  | 1.09  | 31.43 | 1.15  | 0.03  | 0.29 | 0.01 | 34     | 2.57     |
|          | GL  | 0.37  | 1.19  | 22.14 | 0.03  | 0.08 | 0.14 | 23.95  | 1.81     |
|          | COL | 1.14  | 0.06  | 0.10  | 13.05 | 0.13 | 0.00 | 14.48  | 1.43     |
|          | UL  | 0.52  | 0.04  | 0.17  | 0.12  | 1.63 | 0.00 | 2.48   | 0.85     |
|          | WA  | 0.39  | 0.25  | 0.08  | 0.15  | 0.10 | 1.23 | 2.2    | 0.97     |
| Total    |     | 91.52 | 34.16 | 24.06 | 18.18 | 2.85 | 1.39 | 172.16 |          |
| Increase |     | 3.51  | 2.73  | 1.92  | 5.13  | 1.22 | 0.16 |        |          |
